# Supplementary material for: Reduction of CO2 to low carbon alcohols on CuO FCs/Fe2O3 NTs catalyst with photoelectric dual catalytic interfaces
Source: Royal Society of Chemistry journal article supplement (doi:10.1039/c3nr03352j), 2013-01-01
Supplement: c3nr03352j.pdf [file c3nr03352j.pdf]

1            **Electronic Supplementary Information for**

2            **Reduction of CO<sub>2</sub> to Low Carbon Alcohols on CuO**  
3            **FCs/Fe<sub>2</sub>O<sub>3</sub> NTs Catalyst with Photoelectric Dual Catalytic**  
4            **Interfaces**

5            **Peiqiang Li,\*<sup>a</sup> Huying Wang,<sup>a</sup> Jinfeng Xu,<sup>a</sup> Hua Jing,<sup>a</sup> Jun Zhang,<sup>a</sup> Haixiang Han<sup>b</sup> and**  
6            **Fusui Lu\*<sup>a</sup>**

7            <sup>a</sup> *Department of Chemistry, Shandong Agricultural University, Shandong 271018, China, E-mail:*

8            *chem\_carbon@yahoo.cn; pqli@sdau.edu.cn*

9            <sup>b</sup> *Department of Chemistry, University at Albany, State University of New York, 1400 Washington Avenue CH 122,*

10           *Albany, NY 12222*

11  
12  
13  
14  
15  
16  
17  
18  
19  
20  
21  
22  
23  
24  
25  
26  
27  
28  
29  
30  
31  
32  
33  
34  
35  
36

37 **Figure S1.** The current transient during anodization of Fe in an 0.25 wt.%  $\text{NH}_4\text{F}$   
38 non-aqueous solution (Volume of water : glycol = 3:97) at 30 V.

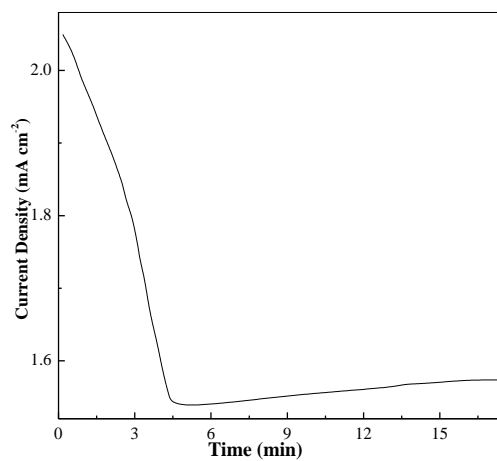

39

40

41

42

43

44

45

46

47

48

49

50

51

52

53

54

55

56

57

58 **Figure. S2a** Electrocatalytic protons reduction of CuO FCs/Fe<sub>2</sub>O<sub>3</sub> NTs in 0.1 mol  
 59 L<sup>-1</sup> KCl solution with different pH.

60 **Figure. S2b** Electrocatalytic CO<sub>2</sub> reduction of CuO FCs/Fe<sub>2</sub>O<sub>3</sub> NTs in 0.1 mol L<sup>-1</sup>  
 61 KHCO<sub>3</sub> solution.

62 **Figure. S2c** Electrocatalytic performance of CuO FCs/Fe<sub>2</sub>O<sub>3</sub> NTs in different  
 63 solutions with the same pH of 9.0 (0.1mol L<sup>-1</sup> KCl solution with the assistance of  
 64 0.1mol L<sup>-1</sup> KOH solution and 0.1mol L<sup>-1</sup> KHCO<sub>3</sub> solution, both purged with  
 65 nitrogen).

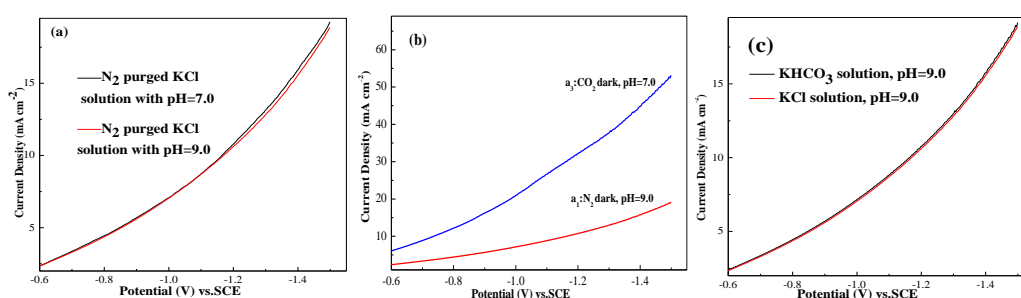

66

### 67 (1) The effect of proton reduction

68 The KCl solution with pH = 7.0 and pH = 9.0 were prepared with the assistance of  
 69 0.1mol L<sup>-1</sup> HCl and 0.1mol L<sup>-1</sup> KOH solution, respectively. The difference of  
 70 reduction current density (Figure S4a) was caused purely by the different proton  
 71 reduction rate.

72 The different current density in Figure S4b must be caused by both proton  
 73 reduction and CO<sub>2</sub> reduction.

74 We calculated the ratio of protons reduction is 0.12%. The equation was as  
 75 followed:

$$\begin{aligned}
 \text{ratio}_{\text{proton reduction}(-1.1\text{V})} &= \frac{\text{proton reduction}}{\text{proton reduction} + \text{CO}_2 \text{ reduction}} \times 100\% \\
 &= \frac{\text{current density}_{\text{KCl}_{\text{pH}7}} - \text{current density}_{\text{KCl}_{\text{pH}9}}}{\text{current density}_{\text{KHCO}_3(\text{pH}7)} - \text{current density}_{\text{KHCO}_3(\text{pH}9)}} \times 100\% \\
 &= \frac{8.7354 - 8.7143}{26.6171 - 8.8170} \times 100\% \\
 &= 0.12\%
 \end{aligned}
 \tag{1}$$

76

77 So we could think that the protons reduction has no impact on our experimental  
78 conclusion.

79 **(2) The effect of CO<sub>2</sub> reduction in bicarbonate solution itself**

80 It must be no reduction of CO<sub>2</sub> in the as mentioned above KCl solution. So the  
81 comparison between the two solutions (Figure S4c) can explain the small CO<sub>2</sub>  
82 reduction in bicarbonate solution itself. The proportion of CO<sub>2</sub> reduction in  
83 bicarbonate solution itself can be calculated by the following equation:

84 
$$\begin{aligned} \text{ratio}_{\text{CO}_2 \text{ reduction in bicarbonate itself (-1.1V)}} &= \frac{\text{current density}_{\text{KHCO}_3(\text{pH9})} - \text{current density}_{\text{KCl}_{\text{pH9}}}}{\text{current density}_{\text{KHCO}_3(\text{pH7})} - \text{current density}_{\text{KHCO}_3(\text{pH9})}} \times 100\% \\ &= \frac{8.8170 - 8.7143}{26.6171 - 8.8170} \times 100\% \\ &= 0.58\% \end{aligned} \quad (2)$$

85 The ratio (0.58%) of CO<sub>2</sub> reduction in bicarbonate solution itself fully explained  
86 the following two points of view: 1) In bicarbonate solutions, even with nitrogen  
87 purge, there could be a small CO<sub>2</sub> reduction. 2) The small CO<sub>2</sub> reduction in  
88 bicarbonate solution itself has no impact on our conclusion.

89

90

91

92

93

94

95

96

97

98

99

100

101

102

103

104

105

106 **Figure S3.** The SEM image of the CuO film/Fe<sub>2</sub>O<sub>3</sub> NTs

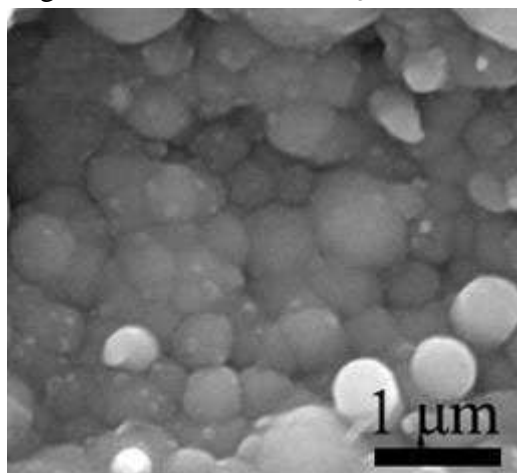

107

108 The Fe<sub>2</sub>O<sub>3</sub> NTs prepared method is the same as CuO FCs/Fe<sub>2</sub>O<sub>3</sub> NTs. And the CuO  
109 film/Fe<sub>2</sub>O<sub>3</sub> NTs was prepared by potentiostatic method, the detailed prepared  
110 condition as followed: the electrolyte 0.4 M CuSO<sub>4</sub> + 3 M lactic acid; constant  
111 potential 0.5 V; pH = 8.0; deposition temperature 50 °C; deposition time 15 minutes.

112

113

114

115

116

117

118

119

120

121

122

123

124

125

126

127

128

129

130

131

132

133

134

135

136 **Figure S4.** Chronocoulometry curves on CuO FCs/Fe<sub>2</sub>O<sub>3</sub> NTs and CuO film/Fe<sub>2</sub>O<sub>3</sub>  
137 NTs

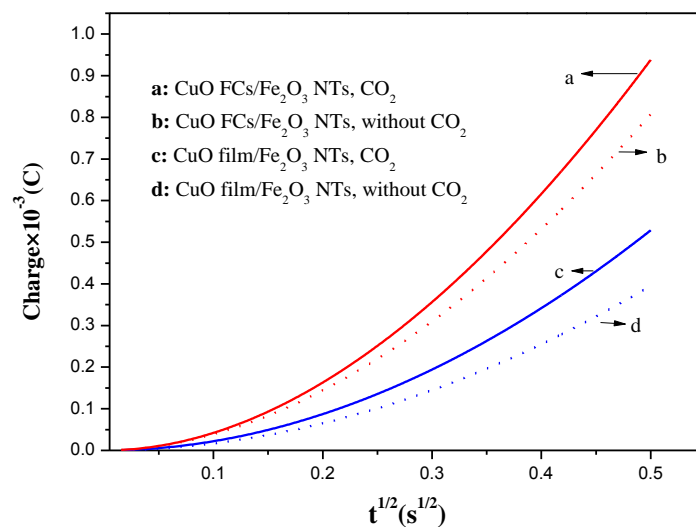

138

139 The adsorptive active site volume  $G$  calculated method was listed below:

140 According to the Cottrell theory:  $Q = nFG + Q_{dl} + 2nFAC^0_{ox}D^{1/2}t^{1/2}/\pi^{1/2}$ , it can be seen

141 from the formula that the total charge  $Q$  has a linear relationship with the  $t^{1/2}$ , but also

142 the intercept in charge-axis is  $nFG + Q_{dl}$ , in the blank medium sulfate solution that the

143 intercept is measured as  $Q_{dl}$ , the difference is  $nFG$ , thus the reaction volume  $G$  in the

144 electrode surface can be obtained ( $n=1$ ). The electrochemical adsorptive amount for

145 the CO<sub>2</sub> on the CuO FCs/Fe<sub>2</sub>O<sub>3</sub> NTs and CuO film/Fe<sub>2</sub>O<sub>3</sub> NTs is 1.65 nmol and 0.62

146 nmol, respectively. The former is 2.66 times of the later.

147

148

149

150

151

152

153

154 Table S1. Comparison between CuO FCs/Fe<sub>2</sub>O<sub>3</sub> NTs and CuO film/Fe<sub>2</sub>O<sub>3</sub> NTs

155

|                                 | CuO FCs/Fe <sub>2</sub> O <sub>3</sub> NTs | CuO film/Fe <sub>2</sub> O <sub>3</sub> NTs |
|---------------------------------|--------------------------------------------|---------------------------------------------|
| Methanol                        | FE 91.20%                                  | FE 15.11%                                   |
|                                 | PS 81.80%                                  | PS 47.06%                                   |
| Ethanol                         | FE 9.80%                                   | 0                                           |
|                                 | PS 8.80%                                   | 0                                           |
| Methane                         | FE 10.46%                                  | FE 24.92%                                   |
|                                 | PS 9.40%                                   | PS 52.94%                                   |
| CO <sub>2</sub> conversiton (%) | 16.92%                                     | 3.03%                                       |

156

157

158

159

160

161

162

163

164

165

166

167

168

169

170

171

172

173

174

175

176

177

178

179

180 **Figure S5.** The SAED pattern of CuO FCs/Fe<sub>2</sub>O<sub>3</sub>NTs

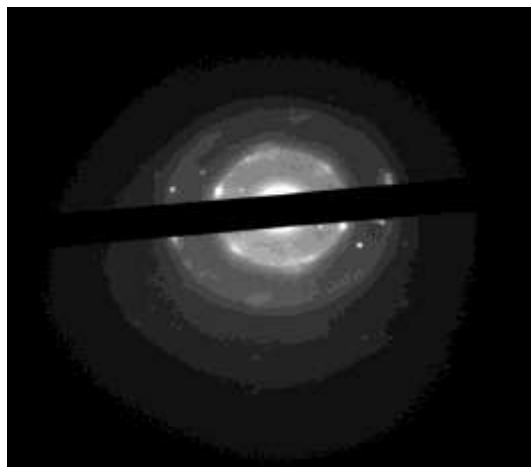

181

182

183

184

185

186

187

188

189

190



191 **Figure S6.** The experimental device of photoelectrocatalytic properties

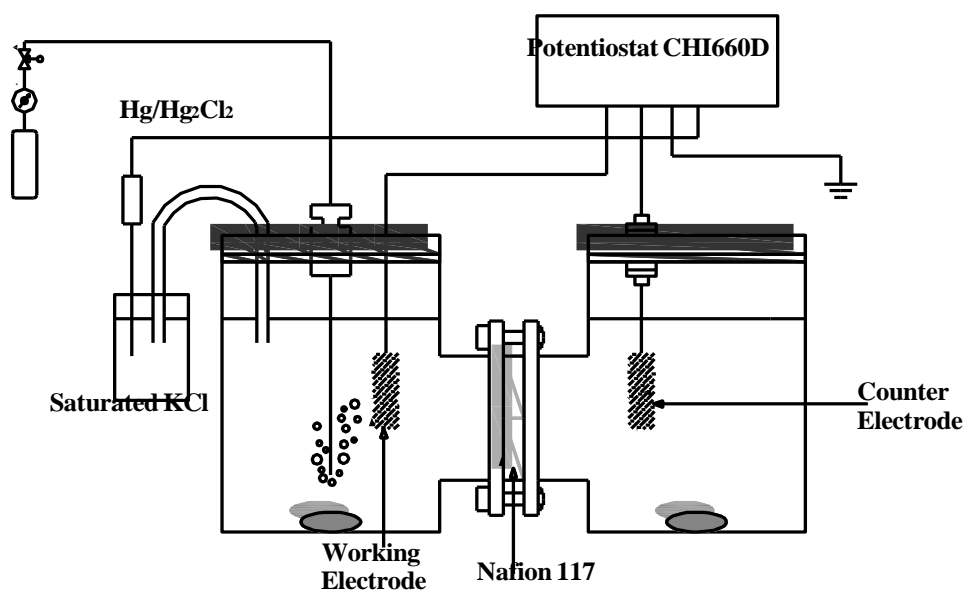

192

193

194

195

196

197

198

199

200

201

202

203
